# Supplementary material
Source: PubMed Central journal article supplement (PMC11640577)
Supplement: boe-15-12-6893-s001.pdf [file boe-15-12-6893-s001.pdf]

Supplemental document accompanying submission to *Biomedical Optics Express*

**Title:** Microfluidics-based automatic immunofluorescence staining for single-molecule localization microscopy

**Authors:** Bing Shi, Jun Dong, Weibing Kuang, Zhen-li Huang

**Submitted:** 8/27/2024 2:14:10 AM

OPTICA  
PUBLISHING GROUP

1

## Supplementary Material

# 2 Microfluidics-based automatic 3 immunofluorescence staining for single- 4 molecule localization microscopy

5 **JUN DONG,<sup>1,†</sup> WEIBING KUANG,<sup>2,†</sup> BING SHI<sup>1,3,\*</sup> AND ZHEN-LI HUANG,<sup>1,3</sup>**

6 <sup>1</sup>State Key Laboratory of Digital Medical Engineering, School of Biomedical Engineering, Hainan  
7 University, Sanya 572025, China

8 <sup>2</sup>Britton Chance Center and MoE Key Laboratory for Biomedical Photonics, School of Engineering  
9 Sciences, Wuhan National Laboratory for Optoelectronics-Huazhong University of Science and  
10 Technology, Wuhan 430074, China

11 <sup>3</sup>Key Laboratory of Biomedical Engineering of Hainan Province, Collaborative Innovation Center of  
12 One Health, Hainan University, Sanya 572025, China

13 <sup>†</sup>These authors contributed equally to this work.

14 \*shibing@hainanu.edu.cn

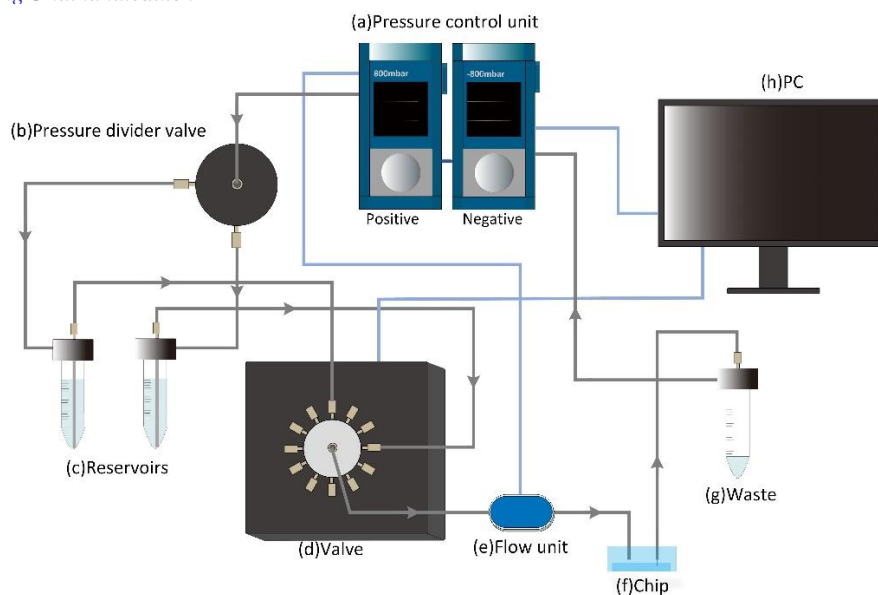

15

16

17 Fig. S1 Schematic illustration of the SRIF-fluidics system. (a)Pressure control unit (Flow EZ, Fluigent):  
18 supply positive pressure and negative pressure separately. (b)Pressure divider valve: divide pressure to  
19 relative reservoirs. (c)Reservoirs: store different reagents. (d)Valve (MUX DISTRIB, Elveflow): switch to  
20 supply correct reagent in right time. (e)Flow unit: monitor real-time flow rate (f)Chip: the chamber for  
21 Immunofluorescence. (g)Waste: store used reagents. (h)PC: control the whole experimental procedure.

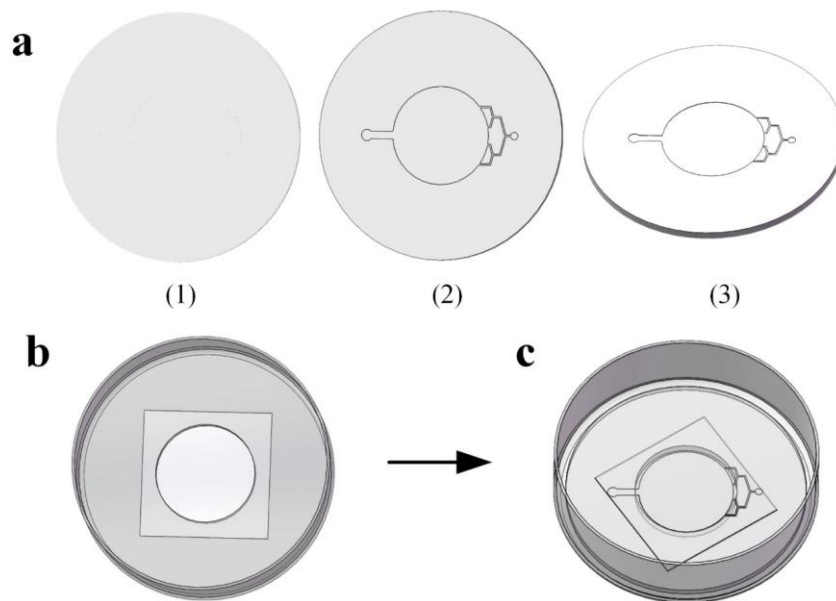

Fig. S2 Schematic illustration of microchip structure. (a)The microchip which show it's front side view (1), back side view (2) and side view (3). (b) The cell culture dish. (c)The chip section consisting of the chip and the cell culture dish.

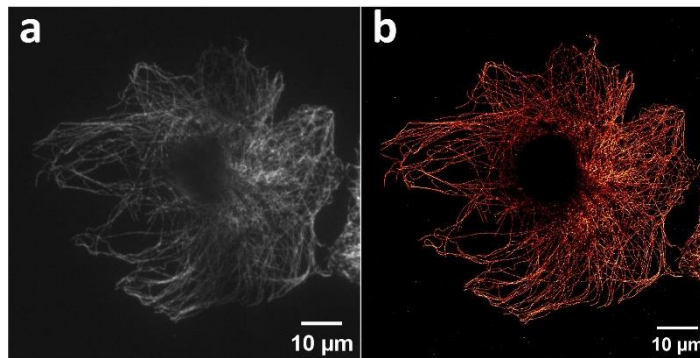

Fig. S3 Results of one incubation protocol with 800-fold antibody dilution. (a) Widefield fluorescence image of microtubule of cos-7 cells. (b) Super-resolution image of the microtubule of cos-7 cells shown in (a).

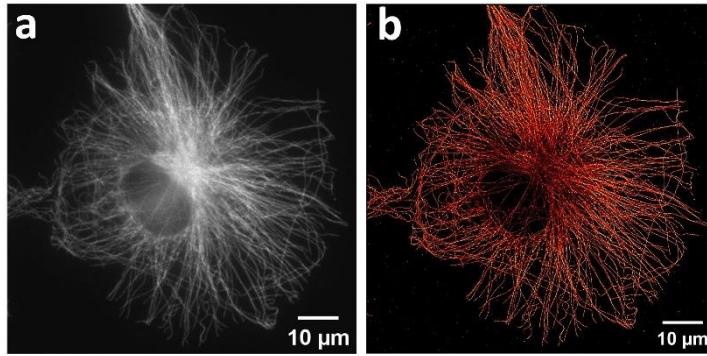

32  
33  
34  
35  
36

Fig. S4 Results of SG protocol with 800-fold antibody dilution. (a) Widefield fluorescence image of microtubule of cos-7 cells. (b) Super-resolution image of the microtubule of COS-7 cells shown in (a).

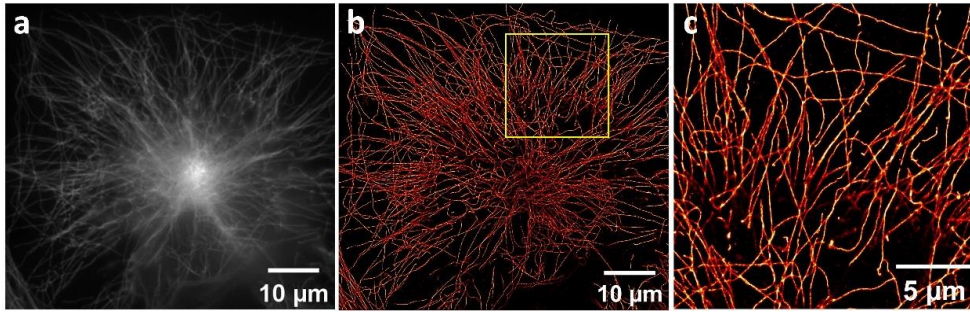

37  
38  
39  
40  
41  
42

Fig. S5 The manual protocol results after replacing the blocking solution. (a) Widefield fluorescence image of microtubule of COS-7 cells. (b) Super-resolution image of microtubule of COS-7 cells from (a). (c) Enlarged view of the yellow boxed area in (b).

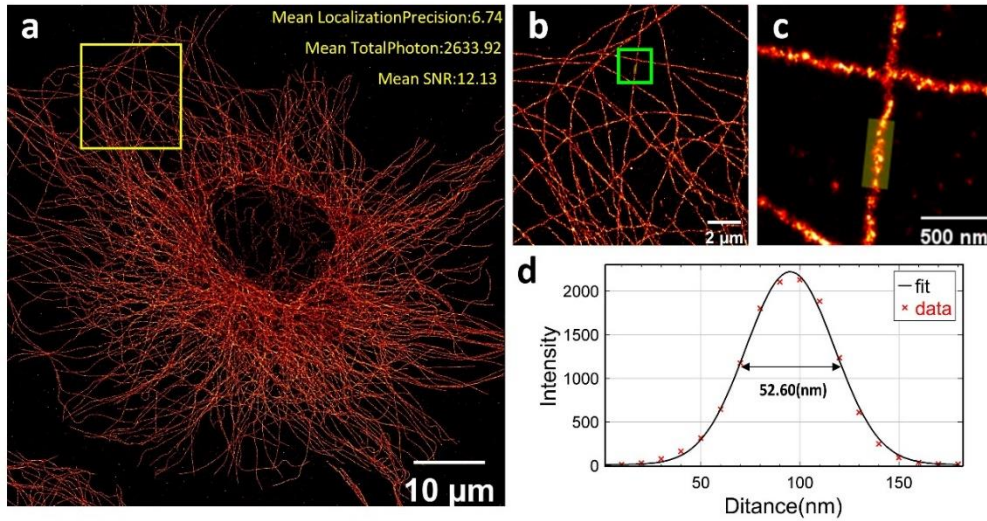

43  
44  
45

Fig. S6 The IF staining results under a half-time SG protocol. (a) Super-resolution image of single-cell

46  
47  
48  
49  
50

microtubules. (b) Enlarged view of the yellow boxed area in (a). (c) Enlarged view of the yellow transparent region highlighting the microtubule used for FWHM calculation. (d) The fitted distribution and FWHM value of the microtubule selected in (c).

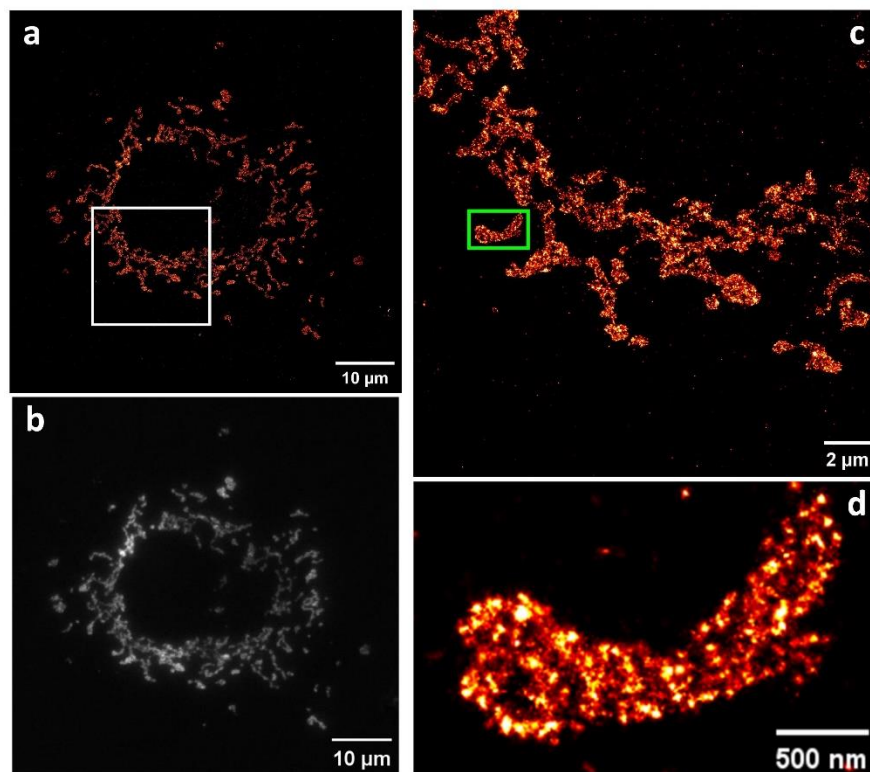

51  
52  
53  
54  
55

Fig. S7 Results of SRIF-fluidics -based CF protocol of mitochondria of COS-7 cells. (a) Super-resolution image of mitochondria. (b) Widefield fluorescence image of mitochondria. (c) Enlarged view of the white boxed area in (b). (d) Enlarged view of the green boxed area in (c).

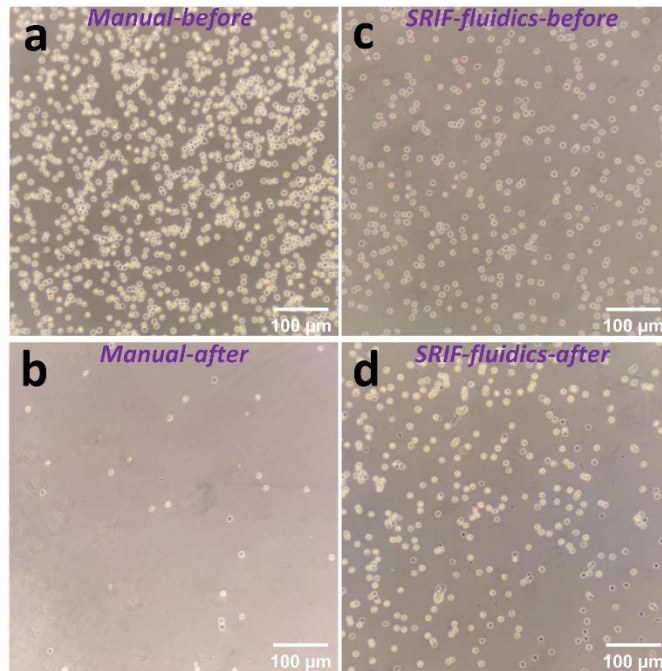

56  
57  
58  
59  
60  
61  
62

Fig. S8 Comparison of manual and SRIF-fluidics-based CF protocols for erythrocytes. (a) Seeded erythrocytes before IF staining using manual protocol. (b) Erythrocytes remaining after manual IF staining. (c) Seeded erythrocytes before IF staining using SRIF-fluidics-based CF protocol. (d) Erythrocytes remaining after SRIF-fluidics IF staining.

## 63 Supplemental Experimental Methods

### 64 Materials and Reagents.

65 Glass-bottom culture dish (MefTak, P35G-1.5-14-C), PFA tube (IDEX,0106-0514-00),  
66 SYLGARD 184 Silicone Elastomer Kit (Dow, 1673921), Fetal Bovine Serum (Gibco,  
67 10099141), DMEM (Gibco, C11995500BT), Trypsin-EDTA (Gibco, 2520056), PBS (Amerko,  
68 R020859), Penicillin-Streptomycin (Gibco, 15140122), Anti- $\alpha$ -Tubulin antibody (Sigma-  
69 Aldrich, T5168), Anti-Tomm20 antibody (Sigma-Aldrich, HPA011562), Anti-EPB41 antibody  
70 (Sigma-Aldrich, HPA028414 ), Alexa Fluor 647-conjugated secondary antibody (Invitrogen,  
71 A-21235 and A-21245), DyLight 633-conjugated secondary antibody (Invitrogen, 35512),  
72 CF680 -conjugated secondary antibody (Biotium, 20820), 8% Paraformaldehyde aqueous  
73 solution (Electron Microscopy Sciences, 157-8), 8% Glutaraldehyde EM Grade (Electron  
74 Microscopy Sciences, 16020), Triton X-100 (Sigma-Aldrich, X100-100ML), Bovine Serum  
75 Albumin (Jackson ImmunoResearch, 001-000-161), Tris (Sigma-Aldrich, T1503), Glucose  
76 (Sigma-Aldrich, G8270), NaCl (Sinoreagent, 10019318), Glucose oxidase (Sigma-Aldrich,  
77 G2133), Catalase (Sigma-Aldrich, C1345), Cysteamine (Sigma-Aldrich, 30070), Poly-Lys  
78 (Sigma-Aldrich, P1274).

79

### 80 Cell culture

81 COS-7 cells (ATCC, CRL-1651, Bohui Biological Technology [Guangzhou] Co., Ltd) were

82 cultured in a common condition of 5% CO<sub>2</sub> at 37°C with complete DMEM. For cell seeding,  
83 after the COS-7 cells grow to 80% ~ 90% fluency, digested to seed in a glass-bottom culture dish.  
84 Until cells have grown to a suitable density (firmly adhered, cell edges are clear and non-  
85 overlapping), then could be used for immunostaining.

## 86 **Erythrocytes**

87 The culture dish should be coated with Poly-L-lysine hydrobromide (Poly-Lys). Added 400 µL  
88 of 0.1 mg/mL Poly-Lys solution to the dish, stood for 3 hours, sucked up the upper solution,  
89 and put the dish into a 37°C oven to dry overnight. Take 4 µL of finger blood in 6 mL PBS-GB  
90 (10 mM glucose, 5 mg/mL PBS solution of BSA) solution. Then centrifuged at 1200 rpm for 5  
91 minutes. Discarded the supernatant and diluted it to appropriate concentrations. Then seeded  
92 erythrocytes in Poly-Lys treated Petri dish. Incubated for 30 minutes at room temperature and  
93 rinsed once with PBS-GB solution to remove unattached erythrocytes, then could be used for  
94 immunostaining.  
95

## 96 **dSTORM super-resolution imaging**

97 The SMLM system was home-built. It was based on an Olympus IX83 microscope equipped  
98 with Olympus 60X/NA1.50 objective lens (UPL APO 60X NA 1.5, Olympus) and sCMOS  
99 camera (Dhyana 400BSI V2, Tucsen). The final pixel size of the system was 108 nm. For  
100 illumination, the 405 nm laser (LWVL405-200mW, Laserwave) was coupled with the 640 nm  
101 laser (LWRL640-3W, LaserWave) into self-designed multi-mode optical fibers. The laser  
102 should be collimated and focused on the back focal plane of the objective lens. The angle of  
103 incidence of the light could be adjusted by moving the electric translation stage (MIT-Z8,  
104 Thorlabs) to switch the illumination mode (Epi illumination or TIRF illumination). The system  
105 could be used for fluorescence imaging and SMLM imaging.

106 SMLM imaging was performed on the above-mentioned system. Labeled samples were  
107 immersed in imaging buffer (50 mM Tris, pH 8.5, 10 mM NaCl, 10% glucose, 100 mM MEA,  
108 500 µg/mL glucose oxidase, 40 µg/mL catalase). And lens oil was added dropwise to the  
109 objective lens. Then placed the dish on the stage and pressed it tightly with the tablet clamp.  
110 When imaging, the 640 nm laser was used for AF647. A low-power laser was used for  
111 fluorescence observation. After a suitable imaging area was found in Epi illumination, then  
112 switch to TIRF illumination. And the laser power was increased to 5.1 kW cm<sup>-2</sup>. When a proper  
113 molecular density was achieved, images should be collected. Typically 10000 frames were  
114 recorded per acquisition with an exposure time of 10 ms.  
115

## 116 **Muti-color super-resolution imaging**

117 Muti-color imaging is also based on our SMLM system. When imaging, the camera was  
118 replaced with colorimetry camera (Retina 200DSC, Tucsen Photonics). Muti-color samples  
119 were immersed in imaging buffer (50 mM Tris, pH 7.5, 10 mM NaCl, 10% glucose, 100 mM  
120 MEA, 500 µg/mL glucose oxidase, 40 µg/mL catalase). And lens oil was added dropwise to the  
121 objective lens. Then placed the dish on the stage and pressed it tightly with the tablet clamp.  
122 When imaging, the 640 nm laser was used for AF647. A low-power laser was used for  
123 fluorescence observation. After a suitable imaging area was found in Epi illumination, then  
124 switch to TIRF illumination. The laser power was increased to 5.1 kW cm<sup>-2</sup>. When a proper  
125 molecular density was achieved, images should be collected. To activate molecules, the 405 nm  
126 laser power was turned up appropriately after the density decreases. Typically, 40000 frames  
127 were recorded per acquisition, with an exposure time of 30 ms.

## 128 **Data processing**

129 Data processing was carried out using the ImageJ plugin QC-STORM developed by our group.  
130 The raw data were opened by the QC-STORM plugin. The parameters such as camera  
131 parameters, pixel size, sub-area size, etc. were set based on the imaging system. Then the single  
132 molecule positioning and rendering were automatically performed. The plugin can also be used  
133 to perform drift correction based on cross-correlation on the positioning data.  
134

## 135 **Data analysis**

136 To calculate FWHM resolution for microtubule super-resolution image, an ImageJ macro  
137 “FWHM\_Line.ijm” was used. For the first use, the macro needs to be installed into ImageJ and  
138 a 500 nm wide scale is scribed along the microtubule cross-section to obtain the fitted  
139 distribution of the cross-section and the corresponding FWHM value. The macro can be  
140 downloaded from this website: [http://imagej.1557.x6.nabble.com/attachment/5004792/0/FWHM\\_Line.ijm](http://imagej.1557.x6.nabble.com/attachment/5004792/0/FWHM_Line.ijm).  
141
